# Supplementary material for: Monochromatic light driven synthesis and growth of flat silver nanoparticles and their plasmon sensitivity
Source: Royal Society of Chemistry journal article supplement (doi:10.1039/d0tc00367k), 2020-01-01

## Supplementary Material

S1: a close-in on the transverse out-of-plane quadrupole mode of Ag nanoplates during the irradiation process, at initial (red), intermediate (green) and final (blue) stage of the process, upon cumulative

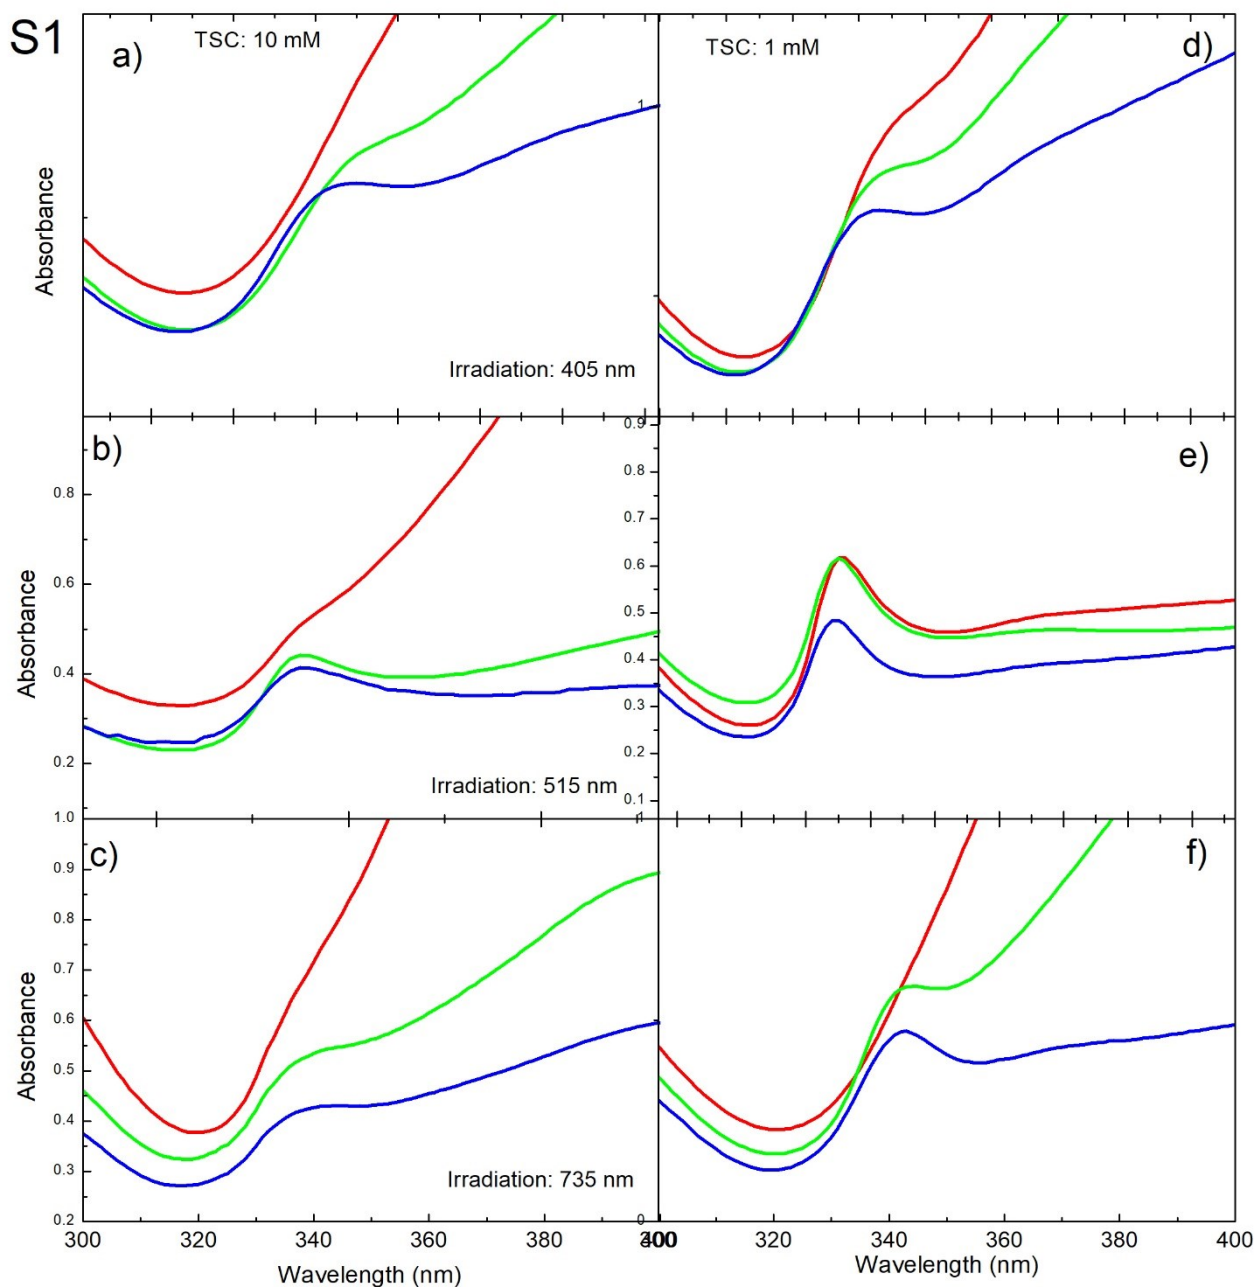

additions of  $\text{H}_2\text{O}_2$ .

S2: reshaping under different irradiation power at 515 nm and [TSC]=10mM

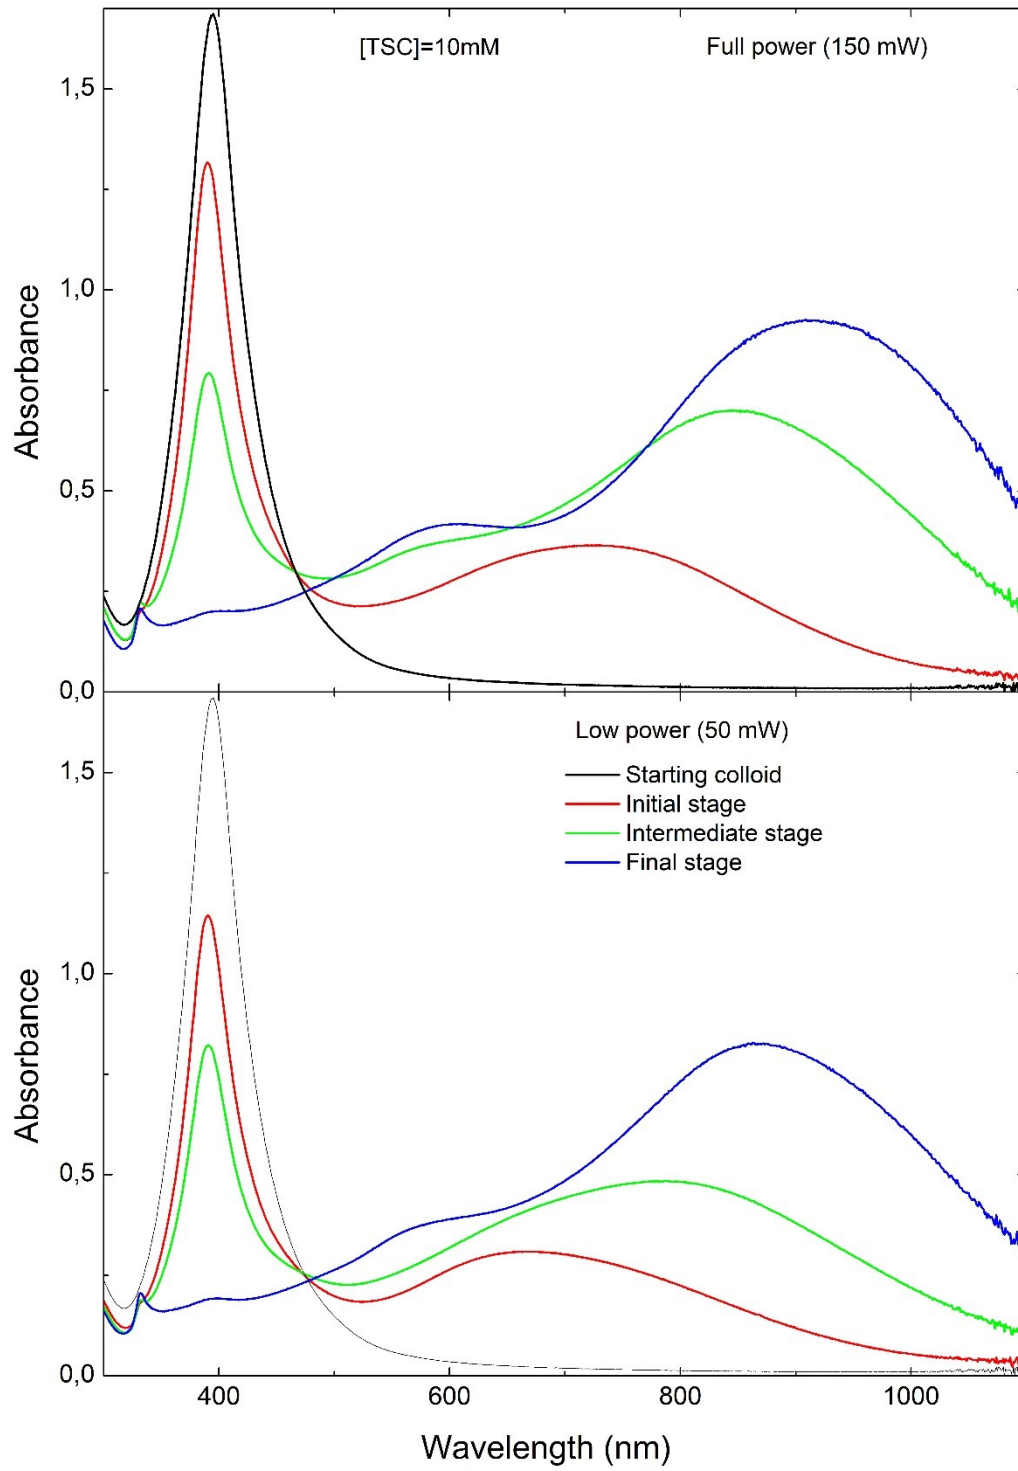

S3: reshaping under different irradiation power at 515 nm and [TSC]=1mM. Absorbance of starting colloid was halved for clarity purpose.

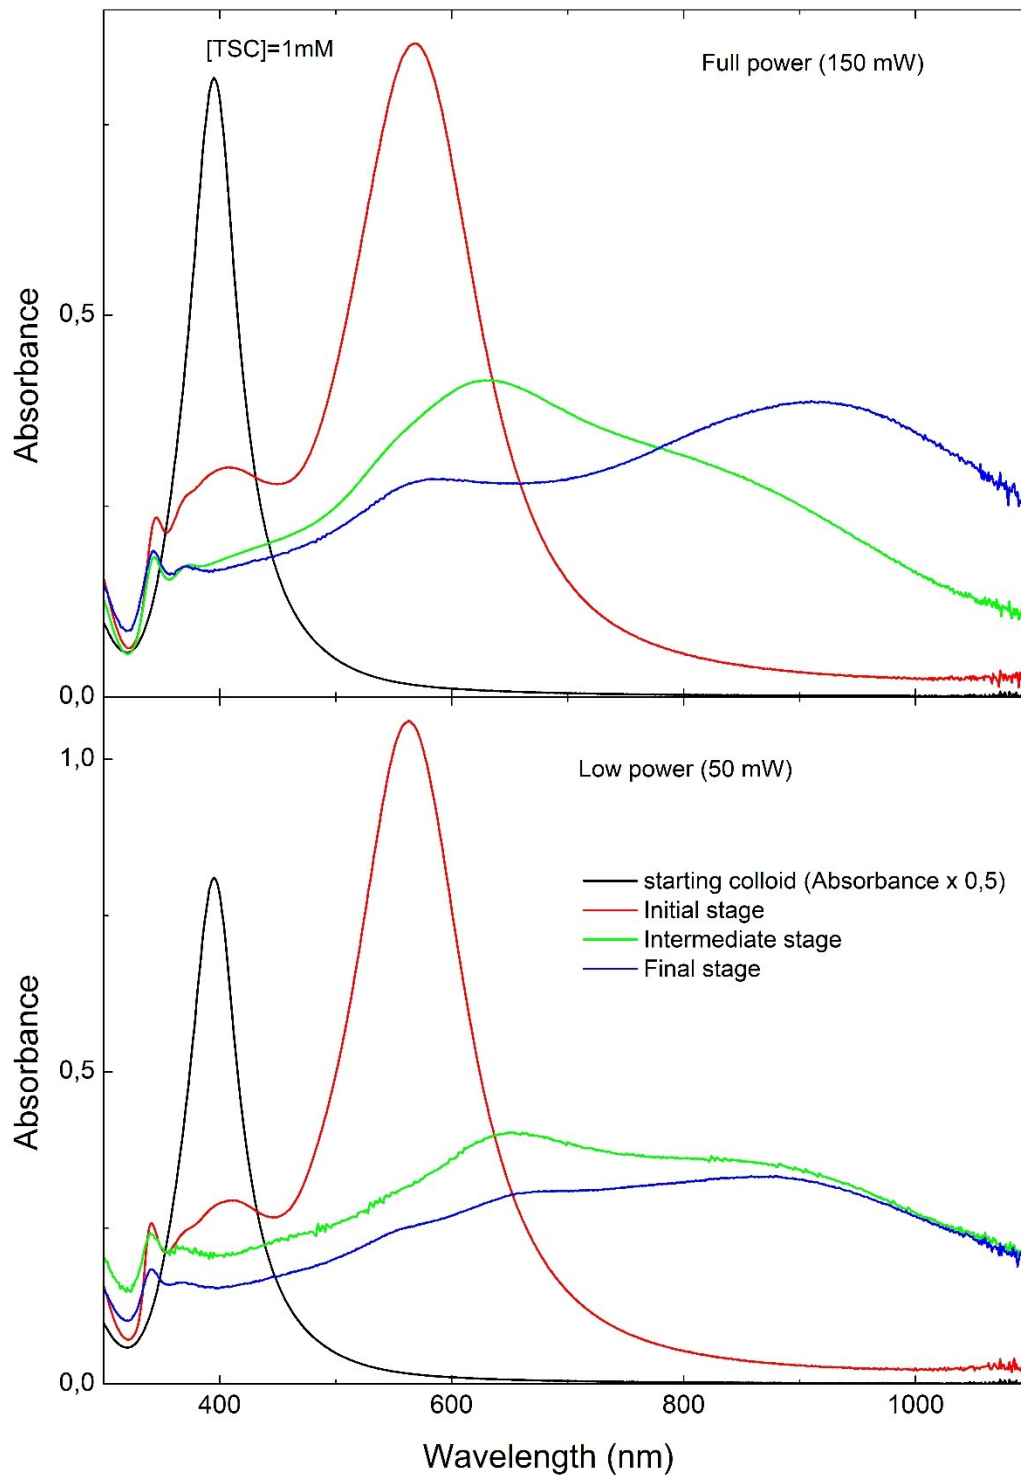

S4: evolution of plasmonic resonance of Ag nanoparticles under 405 nm irradiation at [TSC]=1mM for 24h, without H<sub>2</sub>O<sub>2</sub>

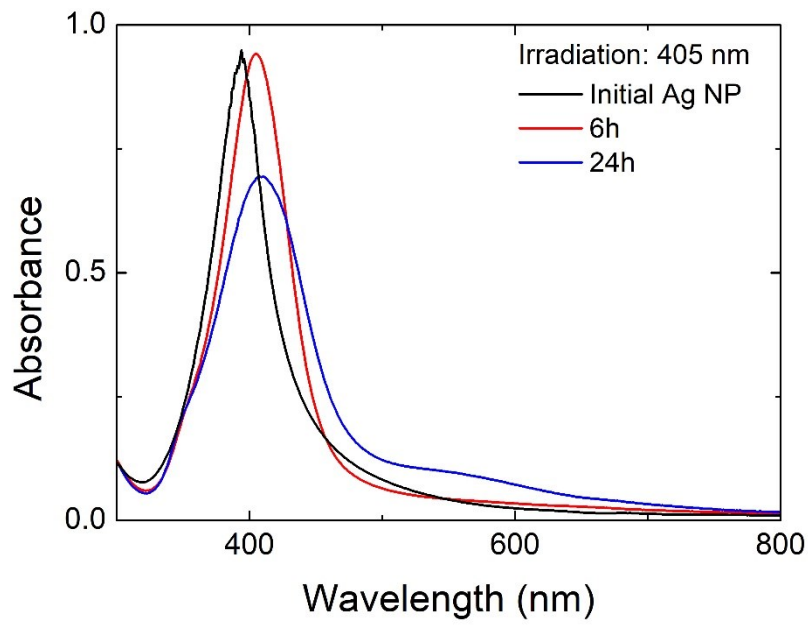

S5: evolution of plasmonic resonance of Ag nanoparticles under 515 nm irradiation at [TSC]=1mM for 24h, without H<sub>2</sub>O<sub>2</sub>.

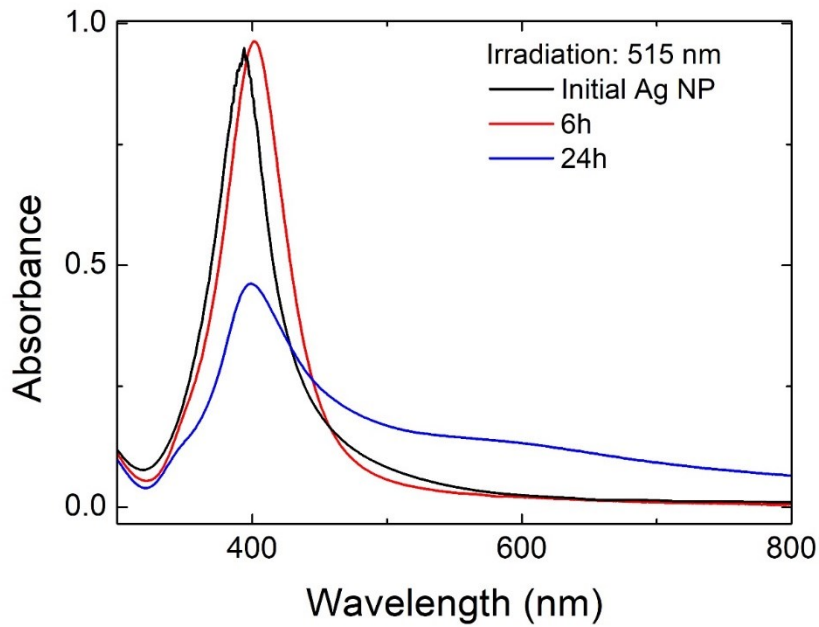

S6: evolution of plasmonic resonance of Ag nanoparticles under 730 nm irradiation at [TSC]=1mM for 24h, without H<sub>2</sub>O<sub>2</sub>.

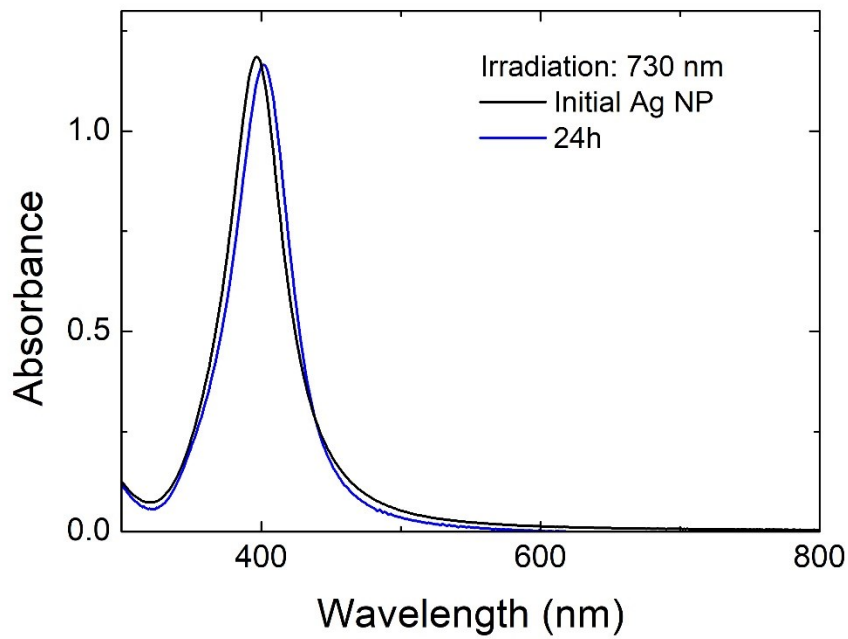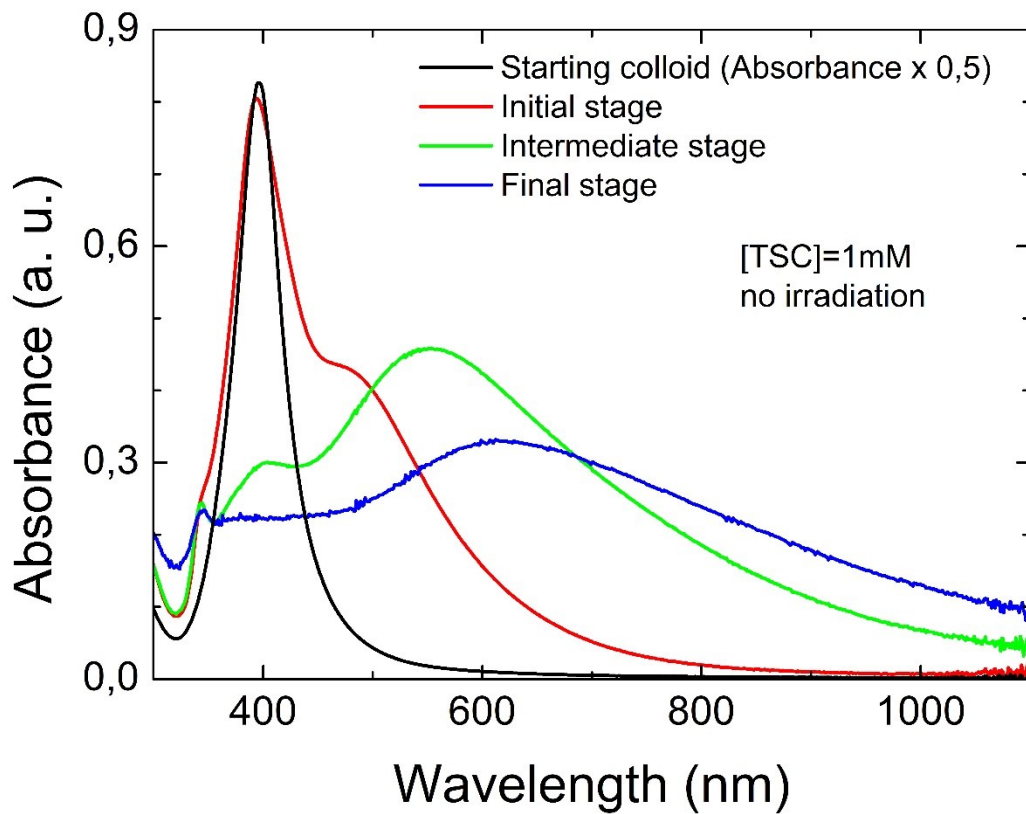

S7-S8: Reshaping process with H<sub>2</sub>O<sub>2</sub> addition in dark conditions at [TSC]=1mM and 10 mM

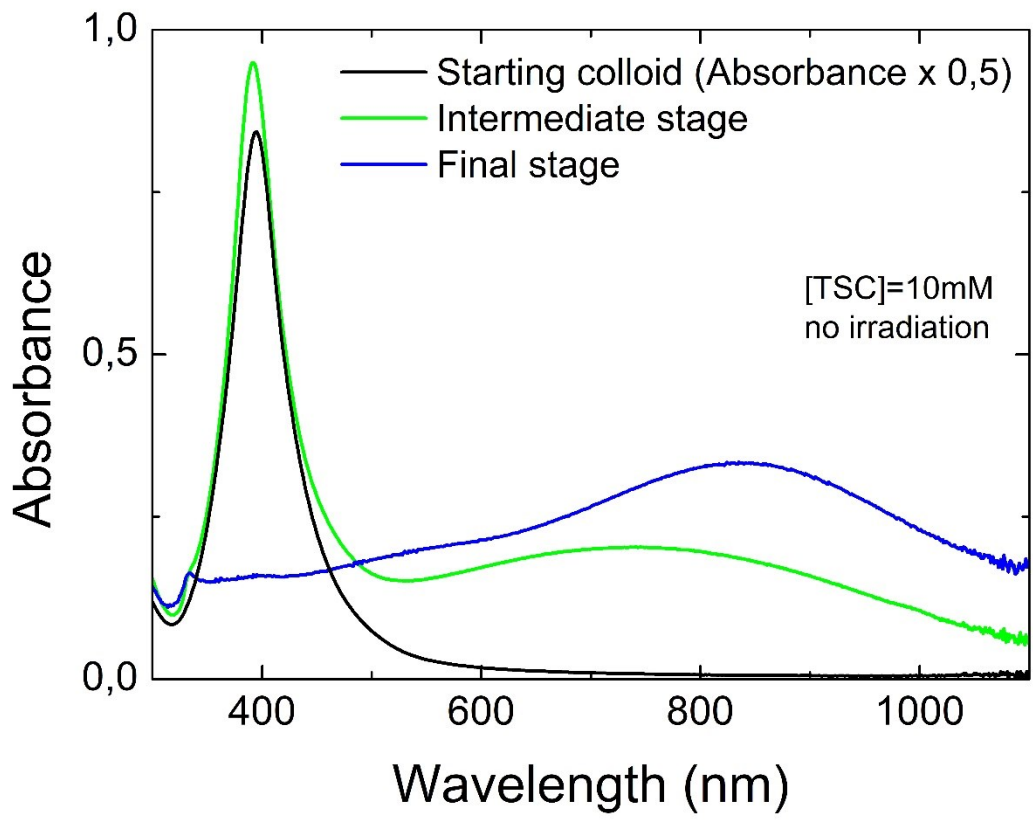

Supplement: d0tc00367k1.pdf [file d0tc00367k1.pdf]
